# How Doctors Choose Medications to Treat Type 2 Diabetes

A national survey of specialists and academic generalists

RICHARD W. GRANT, MD, MPH<sup>1,2</sup>  
DEBORAH J. WEXLER, MD<sup>2</sup>  
ALICE J. WATSON, MD<sup>3</sup>  
WILLIAM T. LESTER, MD<sup>4</sup>

ENRICO CAGLIERO, MD<sup>2</sup>  
ERIC G. CAMPBELL, PHD<sup>5</sup>  
DAVID M. NATHAN, MD<sup>2</sup>

**OBJECTIVE** — Glycemic control remains suboptimal despite the wide range of available medications. More effective medication prescription might result in better control. However, the process by which physicians choose glucose-lowering medicines is poorly understood. We sought to study the means by which physicians choose medications for type 2 diabetic patients.

**RESEARCH DESIGN AND METHODS** — We surveyed 886 physician members of either the Society of General Internal Medicine (academic generalists, response rate 30%) or the American Diabetes Association (specialists, response rate 23%) currently managing patients with type 2 diabetes. Respondents weighed the importance of 15 patient, physician, and nonclinical factors when deciding which medications to prescribe for type 2 diabetic subjects at each of three management stages (initiation, use of second-line oral agents, and insulin).

**RESULTS** — Respondents reported using a median of five major considerations (interquartile range 4–6) at each stage. Frequently cited major considerations included overall assessment of the patient's health/comorbidity, A1C level, and patient's adherence behavior but not expert guidelines/hospital algorithms or patient age. For insulin initiation, academic generalists placed greater emphasis on patient adherence (76 vs. 60% of specialists,  $P < 0.001$ ). These generalists also identified patient fear of injections (68%) and patient desire to prolong noninsulin therapy (68%) as major insulin barriers. Overall, qualitative factors (e.g., adherence, motivation, overall health assessment) were somewhat more highly considered than quantitative factors (e.g., A1C, age, weight) with mean aggregate scores of 7.3 vs. 6.9 on a scale of 0–10,  $P < 0.001$ .

**CONCLUSIONS** — The physicians in our survey considered a wide range of qualitative and quantitative factors when making medication choices for hyperglycemia management. The apparent complexity of the medication choice process contrasts with current evidence-based treatment guidelines.

*Diabetes Care* 30:1448–1453, 2007

There are over 30 unique medicines from 9 different drug classes currently approved for the treatment of hyperglycemia in type 2 diabetic patients, with dozens more medicines and several new drug classes in development (1–4).

Given the wide array of options, it is not surprising that physicians demonstrate wide variation in the choice and sequence of medications prescribed for diabetes management (5–7). Few studies, however, have evaluated how physicians de-

cide which medicines to prescribe (8), and no studies, to our knowledge, have focused on glycemia-lowering medicines.

In contrast to hyperlipidemia treatment (9) and, to a lesser extent, hypertension management (10), until recently there have been no widely accepted treatment guidelines for hyperglycemia that specifically recommend which medicines to prescribe and in what sequence. A recent American Diabetes Association (ADA) and European Association for the Study of Diabetes consensus statement (11), developed in part to address suboptimal glycemic control, emphasizes three common, inexpensive medications (metformin, sulfonylureas, and insulin) and advocates a simple algorithm with branch-point decisions based on A1C level, cost, and effectiveness of medications in lowering glycemia. Although data are lacking to determine whether dissemination of this new algorithm will change practice patterns or improve glycemic control, prior research suggests that many physicians do not conform to standard practice or expert recommendations (12,13).

Population-based studies have repeatedly demonstrated that current glycemic management continues to fall short of evidence-based A1C goals (14,15). To the extent that variation from best practice results in less effective glucose control, understanding practice variation in choice of glycemic medicines may inform more effective interventions to improve type 2 diabetes management. We hypothesized that prescription choices may be driven by patient factors (e.g., weight, motivation to improve), physician-specific variables (e.g., usual practice patterns), and/or nonclinical issues (e.g., patient out-of-pocket expenses). To address these hypotheses, we conducted a survey to elicit physicians' considerations when making prescription choices at various stages of glycemic management. Because evidence-based guidelines typically rely on objectively measurable criteria such as A1C level and weight, we also sought to compare the relative importance respon-

From the <sup>1</sup>General Medicine Unit, Massachusetts General Hospital, Harvard Medical School, Boston, Massachusetts; the <sup>2</sup>Diabetes Center, Massachusetts General Hospital, Harvard Medical School, Boston, Massachusetts; the <sup>3</sup>Partners Telemedicine Program, Massachusetts General Hospital, Harvard Medical School, Boston, Massachusetts; the <sup>4</sup>Laboratory of Computer Science, Massachusetts General Hospital, Harvard Medical School, Boston, Massachusetts; and the <sup>5</sup>Institute for Health Policy, Massachusetts General Hospital, Harvard Medical School, Boston, Massachusetts.

Address correspondence and reprint requests to Richard W. Grant, MD, MPH, 50-9 Staniford St., Boston, MA 02114. E-mail: rgrant@partners.org.

Received for publication 8 December 2006 and accepted in revised form 20 February 2007.

Published ahead of print at <http://care.diabetesjournals.org> on 2 March 2007. DOI: 10.2337/dc06-2499.

**Abbreviations:** ADA, American Diabetes Association; SGIM, Society of General Internal Medicine.

A table elsewhere in this issue shows conventional and Système International (SI) units and conversion factors for many substances.

© 2007 by the American Diabetes Association.

The costs of publication of this article were defrayed in part by the payment of page charges. This article must therefore be hereby marked "advertisement" in accordance with 18 U.S.C. Section 1734 solely to indicate this fact.

dents gave to qualitative versus quantitative criteria.

## RESEARCH DESIGN AND METHODS

### Survey development

We designed our survey to address three key steps in the medication prescription pathway for type 2 diabetic patients: 1) choice of first agent; 2) use of thiazolidinediones (glitazones), which are often considered second-line agents; and 3) initiation of insulin.

We convened four focus groups that included primary care physicians and diabetologists to generate a list of potential factors considered by physicians when making glycemic medication choices. Based on feedback from these groups and data available from the literature (16–18), we grouped our variables of interest into the following four mutually exclusive categories: 1) objective patient clinical data, including patient's age, weight, last-measured A1C, and for the questions about insulin, pattern of self-measured glucose levels; 2) subjective patient factors, including adherence behavior, specific medication requests, patient's desire to delay or avoid insulin injection, and for the questions about insulin, patient's motivation to improve; 3) medication costs; and 4) physician factors, including physician's usual or prior practice, expert guidelines or hospital algorithms, and physician's assessment of patient's health status and comorbid conditions. For glitazones, we asked about physicians' desire to improve patient's lipid profile and/or to reduce insulin resistance and their desire to delay or avoid need for insulin. For insulin, we also asked about the influence of the doctor-patient therapeutic relationship.

For each section of the survey, respondents were asked to indicate to what extent each factor was a "major consideration," "minor consideration," or "not a consideration" when making a medication prescription decision. Each question also clearly asked respondents to exclude any medical contraindications from consideration. Respondents were given the opportunity to list additional criteria not included in the survey.

### Survey sample and administration

The Society of General Internal Medicine (SGIM) and ADA members were invited via e-mail in April 2006 to participate in the web-based survey. These two organi-

zations were chosen as representative professional societies for academic generalists (SGIM) and for physicians with particular clinical interest in diabetes care (ADA). Eligibility criteria for study participation included status as a U.S. or Canadian physician, valid e-mail address voluntarily listed in the published membership directory, and that the physician be currently managing patients with diabetes. Additional criteria for ADA members included a self-designated clinical emphasis (vs. administration or research). The 12 eligible physicians with membership in both societies were included with the ADA cohort under the assumption that ADA membership connoted a special interest in diabetes care. Endocrinologists comprised 54% of the ADA respondents. Compared with ADA physicians who were not endocrinologists, a similar proportion of ADA endocrinologists worked in a community practice setting; the endocrinologists had similar years of training and a higher caseload of diabetic patients.

All physicians meeting eligibility criteria received an initial e-mail briefly describing the study, enrollment in a \$40.00 gift card lottery after survey completion, and a link to the web-based survey site. In the next 1–2 weeks, a reminder e-mail was sent. Overall, 886 surveys were returned within 4 weeks of distribution, including 450 responses from SGIM members (30% response rate) and 436 responses from ADA members (23% response rate).

### Statistical analysis

For each stage of management, the proportion of respondents indicating that an item was a "major consideration" was tabulated and the proportions ranked. Generalist and specialist responses were compared using  $\chi^2$  tests. In an exploratory analysis, we also grouped the individual survey items into two categories (quantitative vs. qualitative) and calculated an aggregate score for each category using the following method: For each item, a response of "major consideration" was assigned +2, "minor consideration" was assigned +1, and "not a consideration" was assigned 0. Scores were then summed, divided by the total number of items in the category, and converted to a 10-point scale. This average aggregate score was used to compare the relative weight given to quantitative factors (e.g., clinically measured patient variables and medication costs) versus qualitative fac-

tors (e.g., subjective patient data and physician factors). Scores were compared using Student's *t* tests, stratified by specialty status. We repeated this analysis using an alternative weighting approach ("major consideration" = +1, "minor consideration" and "not a consideration" = 0) and obtained qualitatively similar results (data not shown). SAS (Version 9.1; SAS Institute, Cary, NC) was used for all analyses. This study was approved by the Massachusetts General Hospital Institutional Review Board.

## RESULTS

### Survey respondents

Of the 886 eligible survey respondents, 97% were staff physicians, and 3% were fellows or residents. ADA respondents were in practice longer compared with SGIM respondents (22 vs. 15 years since medical school graduation, respectively,  $P < 0.01$ ) and were more likely to work in private practice (38 vs. 2%,  $P < 0.01$ ) than in an academic center (40 vs. 78%,  $P < 0.01$ ). Over two-thirds of ADA members (67%) reported treating >100 patients with type 2 diabetes in the prior year compared with 41% of SGIM respondents ( $P < 0.01$ ). Overall, 92% of physicians treated >20 patients with type 2 diabetes in the preceding year.

### Choice of first glycemic medicine

Table 1 presents the list of variables considered when choosing which medicine to prescribe first for glycemic control in type 2 diabetic patients, ranked by proportion of respondents designating each variable as a "major consideration". Respondents indicated a median of five major considerations (interquartile range 4–6) when choosing which medicine to prescribe first. The three most frequently cited major considerations were: "assessment of the patient's health status and co-morbid conditions" (89% of respondents), "extent of HbA1c elevation" (74%), and "patient's weight" (66%). Although specialists and generalists differed significantly in the absolute percentage of respondents ranking each factor as a major consideration, the rank order of factors was similar except for a greater relative emphasis by generalists on patients' adherence behavior, out-of-pocket costs, and published guidelines.

In addition to the list of survey items, 314 respondents (35%) wrote in additional considerations. These respondent comments could be grouped into the fol-

**Table 1—Major considerations when choosing initial hypoglycemic medical therapy**

| Major considerations                                   | Specialist<br>(n = 379) | Academic generalist<br>(n = 440) | P      |
|--------------------------------------------------------|-------------------------|----------------------------------|--------|
| Assessment of patient's health and comorbid conditions | 93 (1)                  | 85 (1)                           | <0.001 |
| Extent of A1C elevation                                | 86 (2)                  | 64 (2)                           | <0.001 |
| Patient's weight                                       | 70 (3)                  | 63 (3)                           | 0.06   |
| Physician's usual practice                             | 68 (4)                  | 54 (5)                           | <0.001 |
| Patient's adherence behavior                           | 59 (5)                  | 57 (4)                           | 0.7    |
| Patient's out-of-pocket costs                          | 49 (6)                  | 52 (6)                           | <0.001 |
| Expert guideline/hospital algorithm                    | 37 (8)                  | 47 (7)                           | 0.01   |
| Patient's age                                          | 38 (7)                  | 22 (9)                           | <0.001 |
| Patient's request                                      | 16 (10)                 | 26 (8)                           | <0.001 |
| Patient's tendency to complain about side effects      | 22 (9)                  | 18 (10)                          | 0.003  |

Data are percentage (rank) of specialists vs. academic generalists listing each major consideration. Considerations are listed in order of overall combined rank.

lowing four broad categories: 1) unique patient factors (e.g., alcoholism, history of injection drug use, long-distance truck driving, dementia, eating habits, etc.), 2) external forces (hospital formulary restrictions and availability of free samples), 3) evidence-based approach (results from clinical trials and efficacy of A1C lowering), and 4) physiologic approach (estimate of insulin resistance, drug mechanisms, and pattern of recent glucose values).

**Use of glitazones**

Specialists were more likely to prescribe glitazones than were generalists (54 vs. 16%, respectively, prescribed glitazones frequently,  $P < 0.001$ ). Among glitazone prescribers, respondents listed a median of five major considerations (4–6). Specialists listed their assessment of the patient's health status and comorbid conditions, the extent of A1C elevation, and motivation to improve lipid profiles/reduce insulin resistance as their three leading considerations. In contrast, generalists prescribed glitazones primarily to avoid insulin (Table 2). Generalists also considered patient's health status and comorbid conditions, the extent of A1C elevation, and out-of-pocket expenses, but not lipid profile/insulin resistance, when considering this drug class. Twenty-five percent of specialists reported that existing guidelines or local hospital algorithms were "not a consideration" when considering glitazones compared with 18% of generalists ( $P = 0.01$ , Table 4).

**Insulin use and barriers**

Extent of A1C elevation, patient-measured blood glucose profiles, and concurrent health status/comorbid conditions were the three most frequently selected major considerations by both specialists and generalists when deciding to initiate insulin therapy (Table 3). Overall, each respondent listed a median of five major considerations (4–7). As with their prescribing attitudes regarding the glitazones, specialists were less concerned than generalists with existing guidelines, with 26 vs. 15%, respectively, reporting that guidelines/algorithms were "not a consideration",  $P < 0.001$  (Table 4).

We also asked survey respondents to indicate whether specific factors were a "major barrier," "minor barrier," or "not a barrier" to insulin initiation. The majority of generalists listed patients' fear or resistance to insulin injections (68%) and patients' preference to give lifestyle modification and oral medicines more time to succeed (68%) as major barriers to insulin initiation. In contrast, few specialists indicated any major barriers to insulin initiation. The majority of respondents also indicated that their own level of experience prescribing insulin (86% specialists, 65% generalists) and concerns about extra time required to address insulin dose adjustment (63% specialists, 53% generalists) were not barriers to insulin prescription.

**Aggregate measures of quantitative versus qualitative factors**

The aggregate mean scores of quantitative items (extent of A1C elevation, age, weight, medication costs, pattern of measured glucose levels) were compared with aggregate mean scores for qualitative items (adherence, assessment of health status and comorbid conditions, usual practice, patient requests, tendency to complain about side effects, patient and physician attitudes toward insulin, patient motivation, and strength of therapeutic relationship). In this exploratory analysis, the qualitative criteria were given greater overall consideration than the quantitative criteria (7.3 vs. 6.8, respectively, on a scale of 0–10,  $P < 0.001$ ).

**Table 2—Major considerations when choosing to prescribe a glitazone**

| Major considerations                                                  | Specialist<br>(n = 369) | Academic generalist<br>(n = 403) | P      |
|-----------------------------------------------------------------------|-------------------------|----------------------------------|--------|
| Assessment of patient's health and comorbid conditions                | 88 (1)                  | 68 (2)                           | <0.001 |
| Patient's desire to avoid insulin                                     | 47 (7)                  | 76 (1)                           | <0.001 |
| Extent of A1c elevation                                               | 65 (2)                  | 60 (3)                           | 0.26   |
| Physician's desire to improve lipid profile/reduce insulin resistance | 63 (3)                  | 39 (6)                           | <0.001 |
| Patient's out-of-pocket costs                                         | 50 (6)                  | 50 (5)                           | 1.0    |
| Physician's desire to avoid/delay insulin                             | 36 (8)                  | 56 (4)                           | <0.001 |
| Physician's usual practice                                            | 57 (4)                  | 32 (8)                           | <0.001 |
| Patient's weight                                                      | 53 (5)                  | 25 (9)                           | <0.001 |
| Expert guideline/hospital algorithm                                   | 24 (9)                  | 36 (7)                           | <0.001 |
| Patient request                                                       | 13 (11)                 | 15 (10)                          | 0.03   |
| Patient age                                                           | 14 (10)                 | 13 (11)                          | 0.47   |

Data are percentage (rank) of specialists vs. academic generalists listing each major consideration. Considerations are listed in order of overall combined rank.

Table 3—Major considerations when choosing to initiate insulin therapy

| Major considerations                                   | Specialist<br>(n = 370) | Academic generalist<br>(n = 434) | P      |
|--------------------------------------------------------|-------------------------|----------------------------------|--------|
| Extent of A1C elevation                                | 93 (1)                  | 92 (1)                           | 0.82   |
| Pattern of measured glucose levels                     | 83 (2)                  | 74 (4)                           | 0.012  |
| Assessment of patient's health and comorbid conditions | 81 (3)                  | 75 (3)                           | 0.06   |
| Patient's motivation to improve                        | 67 (4)                  | 71 (5)                           | 0.06   |
| Patient's adherence behavior                           | 60 (5)                  | 76 (2)                           | <0.001 |
| Strength of therapeutic relationship with patient      | 46 (6)                  | 38 (6)                           | <0.001 |
| Expert guideline/hospital algorithm                    | 26 (7)                  | 37 (7)                           | <0.001 |
| Patient's weight                                       | 20 (9)                  | 24 (8)                           | <0.001 |
| Patient age                                            | 20 (9)                  | 20 (9)                           | 0.92   |
| Patient's out-of-pocket costs                          | 22 (8)                  | 24 (8)                           | 0.65   |

Data are percentage (rank) of specialists vs. academic generalists listing each major consideration. Considerations are listed in order of overall combined rank.

Qualitative criteria were given an aggregate weight of 7.2 by academic generalists vs. 7.3 by specialists ( $P = 0.09$ ) and quantitative criteria 6.6 vs. 7.1 by academic generalists and specialists, respectively,  $P < 0.001$ .

**CONCLUSIONS**— This survey of over 850 practicing physicians examined which factors were considered when making medication choices at three distinct stages of glycemic management. In one of the largest and most detailed surveys of physician decision making of its kind, we found that survey respondents reported considering a range of issues when choosing drug treatment options, such as overall assessment of their patients' health and comorbid conditions

and the patient's A1 level, adherence, and motivation to improve and/or avoid insulin. Many physicians also reported that their choices were constrained by medication costs and/or formulary restrictions but not by expert guidelines or hospital algorithms.

What are the implications of our survey for diabetes management? Although there are many contributors to the observed difficulty in achieving national goals of glycemic control, effective medication prescription remains a central task for physicians. Our survey respondents considered a median of five qualitative and quantitative factors when choosing which medications to prescribe. The apparent complexity of their medication decision-making contrasts with a recently

published algorithm that begins with metformin (when not contraindicated), followed by one of three choices (sulfonylureas, insulin, or glitazones) depending on subsequent A1C levels, side effects, and medication cost (11). Our findings suggest that efforts to effectively implement parsimonious guidelines may be hindered by the current complexity of decision making reported by physicians.

The relative importance of different factors varied at each management stage. When choosing to initiate drug therapy, survey respondents often considered patient weight and adherence behavior, two factors particularly relevant to metformin prescription. The prescription attitudes regarding glitazones differed markedly by specialty status, both in frequency and rationale. Specialists were much more likely to consider prescribing these agents and, in doing so, often considered intermediate physiologic end points (e.g., insulin sensitivity, lipid profile) not necessarily supported by large clinical trials of diabetes-related complications. In contrast, academic generalists appeared to view glitazones as a means of delaying or avoiding insulin.

Although we did not specifically ask about frequency of insulin prescription, other studies have consistently reported greater insulin use by diabetes specialists, a reflection in part of their management of patients with more severe disease (19,20). Prior studies have shown that patients cared for by specialists tend to have longer duration of diabetes, more diabetes-related comorbidity, more complex medical regimens, and higher levels of motivation (21–24). Regarding barriers to insulin use, academic generalists highlighted patient-derived barriers (patients' fears/resistance to insulin and patients' preference to extend noninsulin therapy) while specialists indicated no major barriers to insulin treatment. This stark contrast in perceived patient preferences may reflect either very different patient populations treated or reluctance by generalists to pursue aggressive insulin strategies in patients with type 2 diabetes (25). Our findings underscore the importance of lowering barriers to starting insulin by developing means to support insulin initiation and titration in the primary care setting.

Implementing guidelines, particularly static flow sheets, has had minimal impact for many clinical conditions (26–28). In systems with electronic medical records, sophisticated decision support

Table 4—Factors most frequently listed as “not a consideration” at each management stage

|                                                 | Specialist | Academic generalist | P      |
|-------------------------------------------------|------------|---------------------|--------|
| When choosing initial hypoglycemic agent        |            |                     | —      |
| n                                               | 379        | 440                 | —      |
| Patient tendency to complain about side effects | 16         | 25                  | 0.001  |
| Patient's specific medication request           | 15         | 16                  | 0.59   |
| Expert guideline/hospital algorithm             | 17         | 14                  | 0.23   |
| When choosing to prescribe a glitazone          |            |                     | —      |
| n                                               | 369        | 403                 | —      |
| Patient's age                                   | 23         | 27                  | 0.22   |
| Patient's specific medication request           | 20         | 27                  | 0.23   |
| Expert guideline/hospital algorithm             | 25         | 18                  | 0.01   |
| When deciding to initiate insulin               |            |                     | —      |
| n                                               | 370        | 434                 | —      |
| Patient's out-of-pocket expenses                | 25         | 26                  | 0.81   |
| Expert guideline/hospital algorithm             | 26         | 15                  | <0.001 |
| Patient's age                                   | 18         | 17                  | 0.7    |

Data are percentages.



driven by evidence-based treatment algorithms can be used to guide appropriate prescription. In one recent example involving hyperlipidemia management, physicians choosing to initiate or increase dose of statin therapy for their patients with elevated LDL levels were presented with a list of statins ranked by calculated LDL-lowering effect and relative out-of-pocket expense based on patient copays (29). This advanced decision support intervention was effective in increasing statin prescription and LDL control in study patients. Many would argue that hyperglycemia treatment is more complex than statin adjustment. Given the emphasis our respondents placed on difficult-to-measure factors such as overall health, adherence, and motivation, implementing advanced decision support for glycemia management may present a difficult challenge.

These data must be interpreted in the context of the study design. Our relatively low response rate, while not unusual for e-mail-based surveys, falls short of ideal rates for survey research. More intensive subject recruitment may have led to higher response rates and possibly some qualitative differences in our results. Moreover, the academic generalists in our survey are likely not representative of community-based primary care physicians who may have very different practice styles and patient populations. Our findings may therefore not be generalizable to other health care systems or practice environments.

Given the paucity of evidence regarding how glycemia-lowering medicines are prescribed in clinical practice, our survey of a select subgroup of practicing U.S. and Canadian physicians serves to generate hypotheses to guide future efforts to change prescribing behavior. In addition, our survey was designed with a list of 15 a priori items for physicians to evaluate; thus, our results necessarily focus on our prespecified factors. Given the very limited body of published work in this area, we relied on focus groups of generalists and specialists within our institution to develop these items and may have excluded other critical factors. We addressed this limitation to some degree by collecting additional free text comments from respondents, a process that highlighted the powerful role of formularies and sample availability in influencing medication choice. The additional comments also underscored the apparent contrast between clinical trial evidence—

versus patient physiology-based approaches to making management decisions. Future studies investigating the process of medication initiation and adjustment should include this dichotomy.

In summary, our results suggest that in the face of limited evidence-based data to guide specific medication prescription choices (30), the physicians in our survey relied on a wide range of both clinically objective and patient-focused factors when managing hyperglycemia. Respondents reported integrating overall clinical assessments with perceptions of patients' adherence, motivation, and concerns about treatments—a more complicated view of medication prescribing than that recommended by recent guideline algorithms. Achieving more uniform and cost-effective hyperglycemic medication management may require both better evidence in favor of specific treatment strategies and further insight into why physicians make individual exceptions from standard care.

**Acknowledgments**— This study was funded in part by a Partners HealthCare System IS Research Council award. R.W. Grant is supported by a National Institute of Diabetes and Digestive and Kidney Diseases Career Development Award (K23 DK067452), and D.M.N. is supported by the Charlton Family Fund.

#### References

1. Lebovitz HE: Therapeutic options in development for management of diabetes: pharmacologic agents and new technologies. *Endocr Pract* 12:142–147, 2006
2. Bloomgarden ZT: Gut-derived incretin hormones and new therapeutic approaches. *Diabetes Care* 27:2554–2559, 2004
3. Mooradian AD, Bernbaum M, Albert SG: Narrative review: a rational approach to starting insulin therapy. *Ann Intern Med* 145:125–134, 2006
4. Odegard PS, Capoccia KL: Inhaled insulin: Exubera. *Ann Pharmacother* 39:843–853, 2005
5. Grant RW, Pirraglia PA, Meigs JB, Singer DE: Trends in complexity of care from 1991 to 2000 for patients with diabetes. *Arch Intern Med* 164:1134–1139, 2004
6. Smith NL, Heckbert SR, Bittner VA, Savage PJ, Barzilay JL, Dobs AD, Psaty BM: Antidiabetic treatment trends in a cohort of elderly people with diabetes: The Cardiovascular Health Study, 1989–1997. *Diabetes Care* 22:736–742, 1999
7. Boccuzzi SJ, Wogen J, Fox J, Sung JCY, Shah AB, Kim J: Utilization of oral hypoglycemic agents in a drug-insured U.S.

- population. *Diabetes Care* 24:1411–1415, 2001
8. Segal R, Hepler CD: Drug choice as a problem-solving process. *Med Care* 23:967–976, 1985
9. National Cholesterol Education Program (NCEP) Expert Panel on Detection, Evaluation, and Treatment of High Blood Cholesterol in Adults (Adult Treatment Panel III): Third report of the National Cholesterol Education Program (NCEP) Expert Panel on Detection, Evaluation, and Treatment of High Blood Cholesterol in Adults (Adult Treatment Panel III) final report. *Circulation* 106:3143–3421, 2002
10. Chobanian AV, Bakris GL, Black HR, Cushman WC, Green LA, Izzo JL Jr, Jones DW, Materson BJ, Oparil S, Wright JT Jr, Roccella EJ, the National Heart, Lung, and Blood Institute Joint National Committee on Prevention, Detection, Evaluation, and Treatment of High Blood Pressure; National High Blood Pressure Education Program Coordinating Committee: The seventh report of the Joint National Committee on Prevention, Detection, Evaluation, and Treatment of High Blood Pressure: the JNC 7 report. *JAMA* 289:2560–2572, 2003
11. Nathan DM, Buse JB, Davidson MB, Heine RJ, Holman RR, Sherwin R, Zinman B: Management of hyperglycemia in type 2 diabetes: a consensus algorithm for the initiation and adjustment of therapy: a consensus statement from the American Diabetes Association and the European Association for the Study of Diabetes. *Diabetes Care* 29:1963–1972, 2006
12. El-Kebbi IM, Ziemer DC, Gallina DL, Dunbar V, Phillips LS: Diabetes in urban African-Americans. XV. Identification of barriers to provider adherence to management protocols. *Diabetes Care* 22:1617–1620, 1999
13. Pugh MJ, Anderson J, Pogach LM, Berlowitz DR: Differential adoption of pharmacotherapy recommendations for type 2 diabetes by generalists and specialists. *Med Care Res Rev* 60:178–200, 2003
14. Saaddine JB, Engelgau MM, Beckles GL, Gregg EW, Thompson TJ, Narayan KM: A diabetes report card for the United States: quality of care in the 1990's. *Ann Intern Med* 136:565–574, 2002
15. Saydah SH, Fradkin J, Cowie CC: Poor control of risk factors for vascular disease among adults with previously diagnosed diabetes. *JAMA* 291:335–342, 2004
16. Grant RW, Buse JB, Meigs JB: Quality of diabetes care in U.S. academic medical centers: low rates of medical regimen change. *Diabetes Care* 28:337–442, 2005
17. Farmer A, Kinmonth AL, Sutton S: Measuring beliefs about taking hypoglycaemic medication among people with type 2 diabetes. *Diabet Med* 23:265–270, 2006
18. Spoelstra JA, Stolk RP, Klungel OH, Erkens JA, Rutten EG, Leufkens HG,

- Grobbee DE: Initiation of glucose-lowering therapy in type 2 diabetes mellitus patients in general practice. *Diabet Med* 21: 896–900, 2004
19. Chin MH, Zhang JX, Merrell K: Specialty differences in the care of older patients with diabetes. *Med Care* 38:131–140, 2000
  20. Huang ES, Gleason S, Gaudette R, Cagliero E, Murphy-Sheehy P, Nathan DM, Singer DE, Meigs JB: Health care resource utilization associated with a diabetes center and a general medicine clinic. *J Gen Intern Med* 19:28–35, 2004
  21. Shah BR, Hux JE, Laupacis A, Zinman B, van Walraven C: Clinical inertia in response to inadequate glycemic control: do specialists differ from primary care physicians? *Diabetes Care* 28:600–606, 2005
  22. Bell RA, Quandt SA, Arcury TA, Snively BM, Stafford JM, Smith SL, Skelly AH: Primary and specialty medical care among ethnically diverse, older rural adults with type 2 diabetes: the ELDER Diabetes Study. *J Rural Health* 21:198–205, 2005
  23. Chin MH, Su AW, Jin L, Nerney MP: Variations in the care of elderly persons with diabetes among endocrinologists, general internists, and geriatricians. *J Gerontol A Biol Sci Med Sci* 55:601–606, 2000
  24. Lawson VL, Lyne PA, Harvey JN, Bundy CE: Understanding why people with type 1 diabetes do not attend for specialist advice: a qualitative analysis of the views of people with insulin-dependent diabetes who do not attend diabetes clinic. *J Health Psychol* 10:409–423, 2005
  25. Peyrot M, Rubin RR, Lauritzen T, Skovlund SE, Snoek FJ, Matthews DR, Landgraf R, Kleinebreil L, the International DAWN Advisory Panel: Resistance to insulin therapy among patients and providers: results of the cross-national Diabetes Attitudes, Wishes, and Needs (DAWN) Study. *Diabetes Care* 28:2673–2679, 2005
  26. Kirkman MS, Williams SR, Caffrey HH, Marrero DG: Impact of a program to improve adherence to diabetes guidelines by primary care physicians. *Diabetes Care* 25: 1946–1951, 2002
  27. Glazier RH, Bajcar J, Kennie NR, Willson K: A systematic review of interventions to improve diabetes care in socially disadvantaged populations. *Diabetes Care* 29: 1675–1688, 2006
  28. O'Connor PJ, Desai J, Solberg LI, Solberg LI, Reger LA, Crain AL, Asche SE, Pearson TL, Clark CK, Rush WA, Cherney LM, Sperl-Hillen JM, Bishop DB: Randomized trial of quality improvement intervention to improve diabetes care in primary care settings. *Diabetes Care* 28:1890–1897, 2005
  29. Lester WT, Grant RW, Chueh H, Barnett GO: Randomized controlled trial of an informatics-based intervention to increase statin prescription for secondary prevention of coronary disease. *J Gen Intern Med* 21:22–29, 2006
  30. Kahn SE, Haffner SM, Heise MA, Herman WH, Holman RR, Jones NP, Kravitz BG, Lachin JM, O'Neill MC, Zinman B, Viberti G; ADOPT Study Group: Glycemic durability of rosiglitazone, metformin, or glyburide monotherapy. *N Engl J Med* 355: 2427–2443, 2006
